# Supplementary material
Source: MDPI journal article supplement (https://www.mdpi.com/2076-3417/10/6/2042)
Supplement: s1 [file s1]

# Supplementary Materials: Application of Digital Particle Image Velocimetry to Insect Motion: Measurement of Upward, Downward, and Lateral Honeybee Traffic

Sarbajit Mukherjee<sup>1</sup> and Vladimir Kulyukin<sup>2</sup>

## 1. Supplementary Honeybee Traffic Videos

These are the videos that we used in a preliminary experiment to estimate if the system can distinguish four qualitative levels (none, low, medium, and high) of honeybee traffic.

1. **NT\_Vid.mp4**. This video is captured by a BeePi monitor placed on top of a Langstroth beehive that consists of three deep supers. It is qualitatively classified as a no traffic (NT) video.
2. **LT\_Vid.mp4**. This video is captured by a BeePi monitor placed on top of a Langstroth beehive that consists of three deep supers. It is qualitatively classified as a low traffic (LT) video.
3. **MT\_Vid.mp4**. This video is captured a BeePi monitor placed on top of a Langstroth beehive that consists of one deep super. It is qualitatively classified as a medium traffic (MT) video.
4. **HT\_Vid.mp4**. This video is captured a BeePi monitor placed on top of a Langstroth beehive that consists of one deep super. It is qualitatively classified as a high traffic (HT) video.

## 2. Human Bee Motion Counts for Four Honeybee Traffic Videos

The supplementary materials include four CSV files that contain human bee motion counts for the four original videos.

1. The file **NT\_Vid\_hbmc.csv** contains frame by frame bee motion counts done by a human evaluator for the video **NT\_Vid.mp4**.
2. The file **LT\_Vid\_hbmc.csv** contains frame by frame bee motion counts done by a human evaluator for the video **LT\_Vid.mp4**.
3. The file **MT\_Vid\_hbmc.csv** contains frame by frame bee motion counts done by a human evaluator for the video **MT\_Vid.mp4**.
4. The file **HT\_Vid\_hbmc.csv** contains frame by frame bee motion counts done by a human evaluator for the video **HT\_Vid.mp4**.
